# Supplementary material for: The preparation and performance evaluation of flame-retardant antistatic composites based on polyurethane
Source: Royal Society of Chemistry journal article supplement (doi:10.1039/d3nj04981g), 2024-01-01
Supplement: d3nj04981g1.pdf [file d3nj04981g1.pdf]

Supporting Information for *New journal of chemistry*

## Preparation and Performance Evaluation of Flame-Retardant Antistatic Composites based on Polyurethane

Zhaoshun Zhan,<sup>a</sup> Qixing Shi,<sup>a</sup> Lei Wang,<sup>\*b</sup> Jinfeng Shen,<sup>a</sup> Tianyou Bao,<sup>a</sup> Lixin Li,<sup>\*a</sup> Fanna Meng<sup>\*c</sup>

<sup>a</sup> College of Environmental and Chemical Engineering, Heilongjiang University of Science and Technology, Harbin, 150022, China.

<sup>b</sup> School of Materials Science and Engineering, Heilongjiang University of Science and Technology, Harbin 150022, China.

<sup>c</sup> College of Mining Engineering, Heilongjiang University of Science and Technology, Harbin 150022, China.

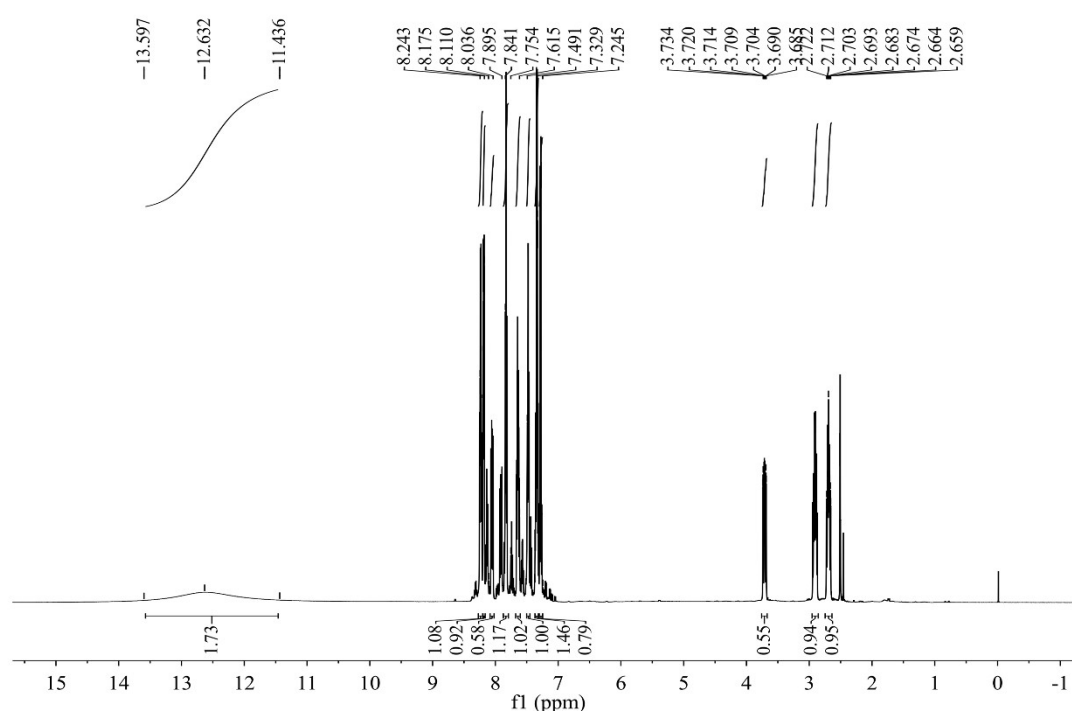

**Figure S1.** <sup>1</sup>H-NMR spectrogram of the DOPO-MA.

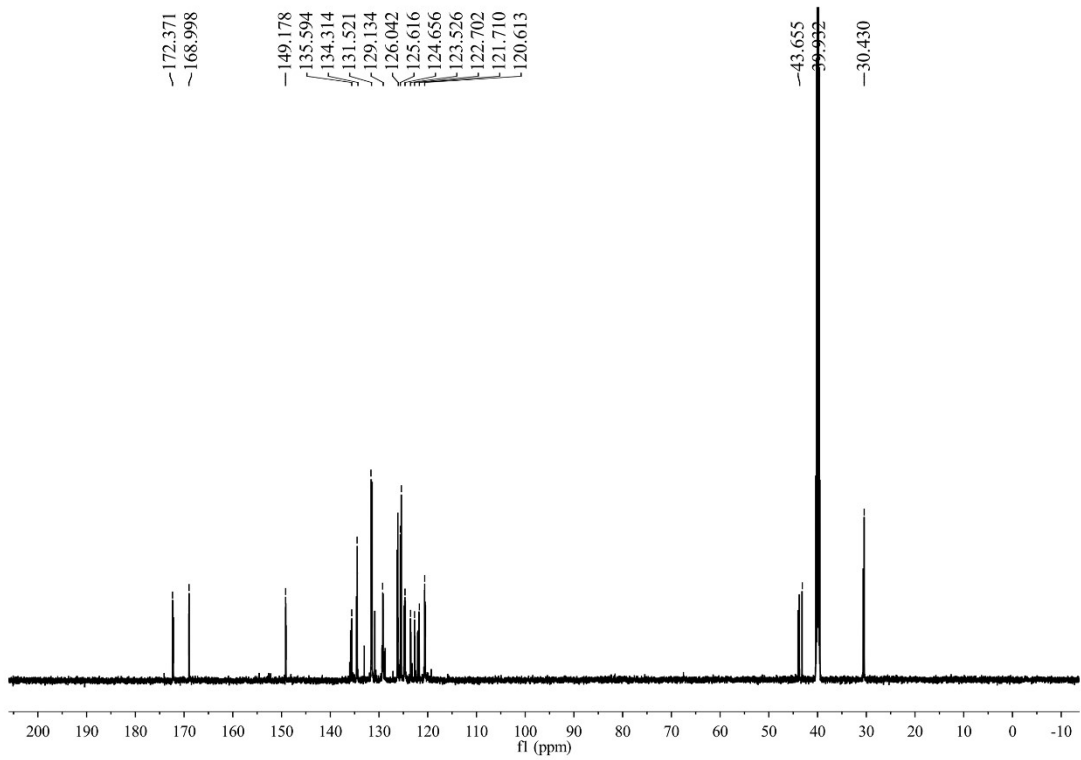

**Figure S2.**  $^{13}\text{C}$ -NMR spectrogram of the DOPO-MA.

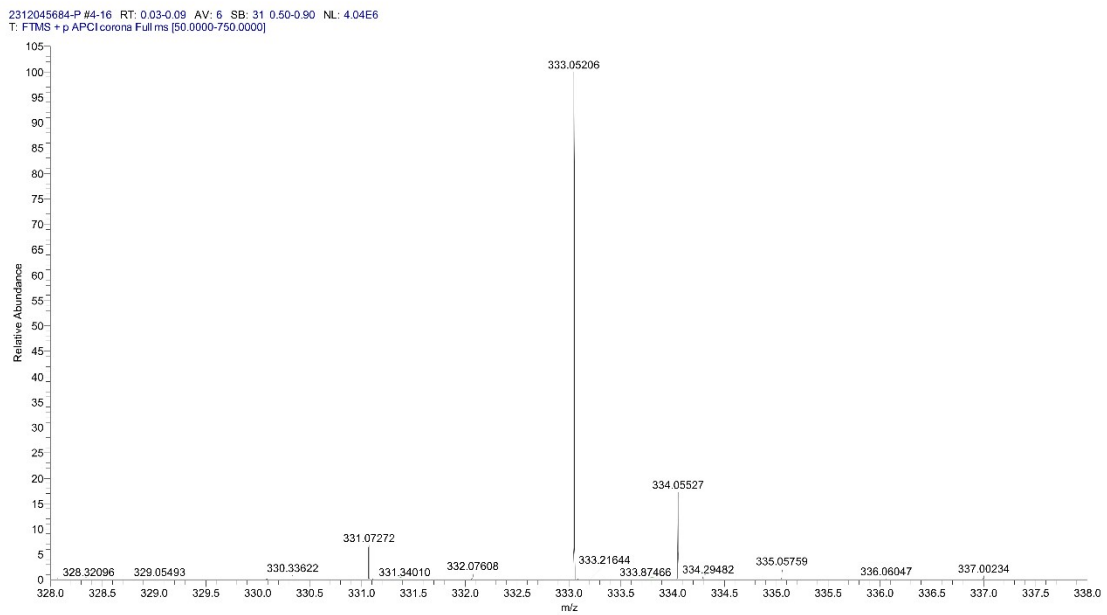

**Figure S3.** HRMS of the DOPO-MA.

**Table S1.** Review of antistatic properties of DMM@NC/RPUF composites.

| Type of filler | Content/%              | Fire retardant | conductive               | Refs.     |
|----------------|------------------------|----------------|--------------------------|-----------|
| DMM@NC         | 25%DMM@NC              | UL-94 HB       | 5.5*10 <sup>9</sup> Ω-cm | This work |
| RH-DAP         | 15%RH-DAP              | UL-94 HB       |                          | [1]       |
| GMAAPP@PUEG    | GMAAPP20/PUEG10        | UL-94 V0       |                          | [2]       |
| MFAPP          | MFAPP30                | UL-94 V1       |                          | [3]       |
| BHET-rGO       | 7.41%BHET-rGO          |                | 8*10 <sup>-3</sup> S/m   | [4]       |
| NCCF@MWCNGT    | NCCF(3php)/MWCNT(3php) |                | 0.171 S/m                | [5]       |
| MWNT           | 3wt%MWNT               |                | 10 <sup>5</sup> Ω-m      | [6]       |

## Notes and references

- 1 T. Son, H. T. T. Nguyen, H. T. Q. Phan, C. T. Pham, B. T. Nguyen, L. H. Pham, T. V. V. Do, H. Vothi, J. Kim, D. Q. Hoang. *Polym. Bull.* 2020, **78**, 1.
- 2 Y. D. Yang, Z. Dai, M. R. Liu, H. H. Jiang, C. G. Fan, B. B. Wang, G. Tang, H. Wang. *J. Macromol. Sci. A.* 2021, **58**, 659.
- 3 G. Tang, H. H. Jiang, Y. D. Yang. *J. Polym. Res.* 2020, **27**, 1022.
- 4 H. He, Q. Y. Li, S. Z. Wang, Y. Shen, C. Zhang, X. T. Liang. *Compos. Commun.* 2022, **35**, 2452.
- 5 M. J. Kim, Y. Lee, G. M. Jang. *J. Appl Polym Sci.* 2017, **134**,0021.
- 6 D. Wang, H. Y. Li, M. F. Li, H. Q. Jiang, M. Xia, Z. Zhou. *J. Mater. Chem. C.* 2013, **1**, 2744.
